# Supplementary material for: Eco-Friendly Coal Gangue and/or Metakaolin-Based Lightweight Geopolymer with the Addition of Waste Glass
Source: MDPI journal article supplement (doi:10.3390/ma16176054), 2023-09-03
Supplement: s1 [file s1]

Supplementary material

# Eco-Friendly Coal Gangue and/or Metakaolin-Based Lightweight Geopolymer with the Addition of Waste Glass

Celina Ziejewska <sup>1</sup>, Agnieszka Bąk <sup>1</sup>, Krzysztof Hodor <sup>2</sup> and Marek Hebda <sup>1,\*</sup>

<sup>1</sup> Cracow University of Technology, Faculty of Materials Engineering and Physics, Warszawska 24, 31-155, Kraków, Poland; celina.ziejewska@pk.edu.pl (C.Z.); agnieszka.bak@pk.edu.pl (A.B.)

<sup>2</sup> NETZSCH (Netzsch Instrumenty Sp. z o.o.), Halicka 9, 31-036 Kraków, Poland; krzysztof.hodor@netzsch.com (K.H.)

\* Corresponding: marek.hebda@pk.edu.pl (M.H.)

**Table S1.** Chemical composition of geopolymer foams.

| Chemical compound              | C      | CG     | M      | MG     | CMG    |
|--------------------------------|--------|--------|--------|--------|--------|
| SiO <sub>2</sub>               | 55.957 | 56.680 | 61.012 | 61.026 | 61.299 |
| Al <sub>2</sub> O <sub>3</sub> | 18.075 | 14.622 | 28.684 | 27.562 | 21.301 |
| Fe <sub>2</sub> O <sub>3</sub> | 11.654 | 11.797 | 1.650  | 1.596  | 5.350  |
| CaO                            | 8.067  | 11.189 | 6.356  | 7.654  | 8.466  |
| K <sub>2</sub> O               | 2.823  | 2.700  | 1.253  | 1.139  | 1.690  |
| SO <sub>3</sub>                | 1.906  | 1.520  | 0.485  | 0.497  | 1.059  |
| TiO <sub>2</sub>               | 1.135  | 1.075  | 0.372  | 0.345  | 0.600  |
| MnO                            | 0.126  | 0.140  | 0.033  | 0.038  | 0.066  |
| V <sub>2</sub> O <sub>5</sub>  | 0.065  | 0.061  | 0.021  | 0.017  | 0.033  |
| SrO                            | 0.061  | 0.063  | 0.027  | 0.029  | 0.041  |
| Cr <sub>2</sub> O <sub>3</sub> | 0.035  | 0.040  | 0.011  | 0.010  | 0.018  |
| ZrO <sub>2</sub>               | 0.033  | 0.034  | 0.016  | 0.016  | 0.025  |
| ZnO                            | 0.026  | 0.028  | 0.013  | 0.012  | 0.016  |
| CuO                            | 0.015  | 0.014  | 0.008  | 0.007  | 0.009  |
| Ga <sub>2</sub> O <sub>3</sub> | 0.007  | -      | 0.010  | 0.007  | 0.007  |
| NbO                            | 0.003  | -      | 0.003  | 0.002  | 0.002  |

**Table S2.** 3D view of the sample, 2D view of the sample (first slice), slice perpendicular to the marked yellow line.

|                     |     |                                                                                     |                                                                                      |                                                                                       |
|---------------------|-----|-------------------------------------------------------------------------------------|--------------------------------------------------------------------------------------|---------------------------------------------------------------------------------------|
| Samples designation | C   | 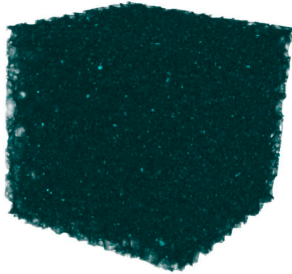   |    |    |
|                     | CG  |   |   |   |
|                     | CMG |  |  |  |
